# Supplementary material
Source: PubMed Central journal article supplement (PMC4375683)
Supplement: mmc1.pdf [file mmc1.pdf]

**Supplementary material: Properties of an inward-facing state of LeuT – conformational stability and substrate release**

Julie Grouleff<sup>†</sup>, Siri Søndergaard<sup>†</sup>, Heidi Koldsø<sup>†,‡</sup>, and Birgit Schiøtt<sup>†</sup>

<sup>†</sup>Center for Insoluble Protein Structures (inSPIN) and Interdisciplinary Nanoscience Center (iNANO), Department of Chemistry, Aarhus University, Langelandsgade 140, 8000 Aarhus C, Denmark

<sup>‡</sup>Current address: Department of Biochemistry, University of Oxford, Oxford, United Kingdom

| Table S1: Overview of residues used for each TM segment in helix tilt analysis |       |       |       |        |         |         |         |         |         |         |         |         |
|--------------------------------------------------------------------------------|-------|-------|-------|--------|---------|---------|---------|---------|---------|---------|---------|---------|
| TM                                                                             | 1a    | 1b    | 2     | 3      | 4       | 5       | 6a      | 6b      | 7       | 8       | 9       | 10      |
| Residue                                                                        | 11-22 | 25-38 | 41-71 | 88-124 | 166-184 | 191-214 | 241-255 | 260-267 | 275-306 | 337-371 | 375-395 | 399-426 |

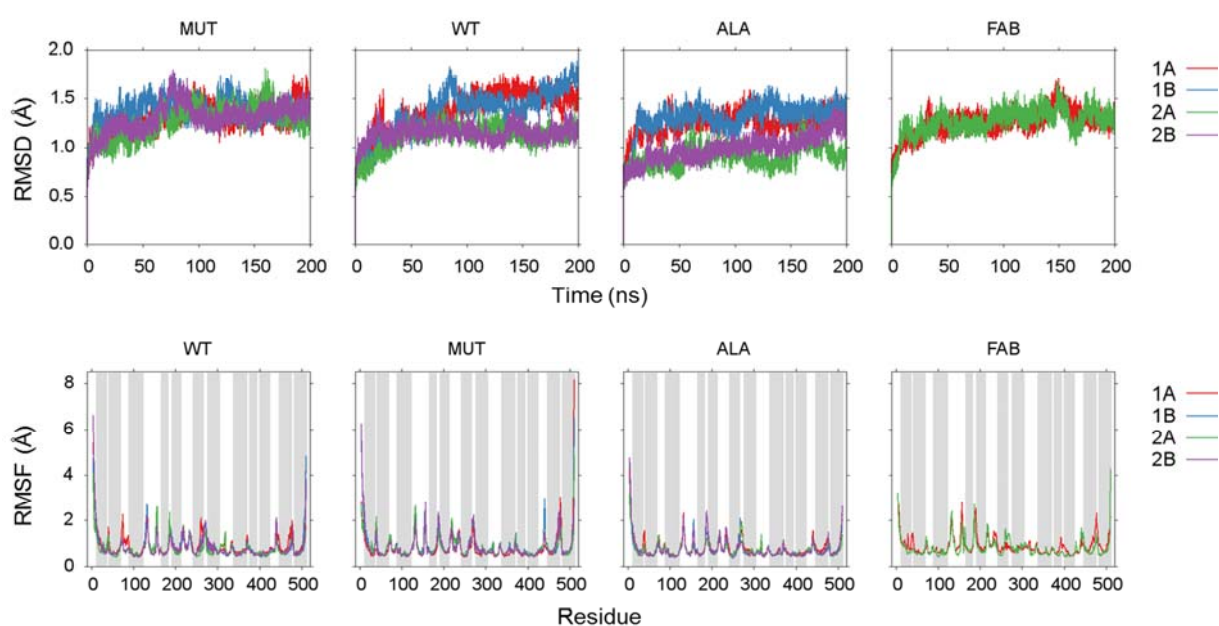

**Figure S1: RMSD and RMSF for each setup.** The RMSD is measured for the  $C_{\alpha}$  atoms in the 12 TMs in LeuT with respect to the structure at 0 ns. The RMSF is calculated with respect to the average position of the  $C_{\alpha}$  atoms in LeuT. The shaded grey areas in the RMFS plots correspond to transmembrane helical segments.

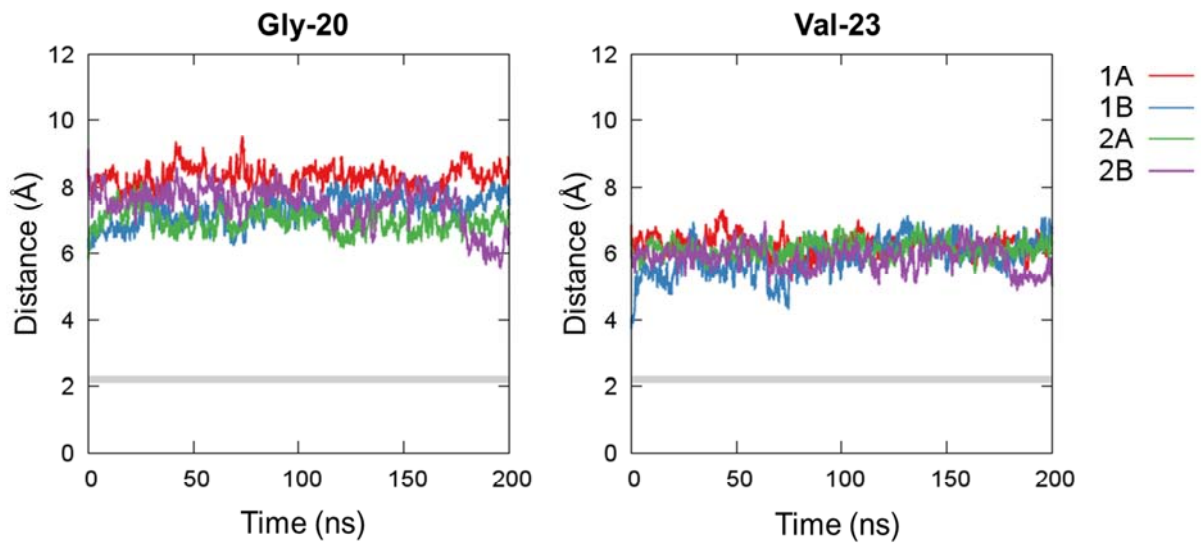

**Figure S2: Distances from carbonyl oxygen atoms in Gly-20 and Val-23 to the center of Na2 site.** The structures have been superimposed on three of the residues in the Na2 site (Ala-351, Thr-354, and Ser-355) in the Na<sup>+</sup> bound, outward-occluded crystal structure (PDB code 2A65), and the center of the Na2 site has been defined as position of the Na<sup>+</sup> ion in the Na2 site in the PDB structure. The grey line represents the oxygen to Na<sup>+</sup> distance in the Na<sup>+</sup> bound structure.

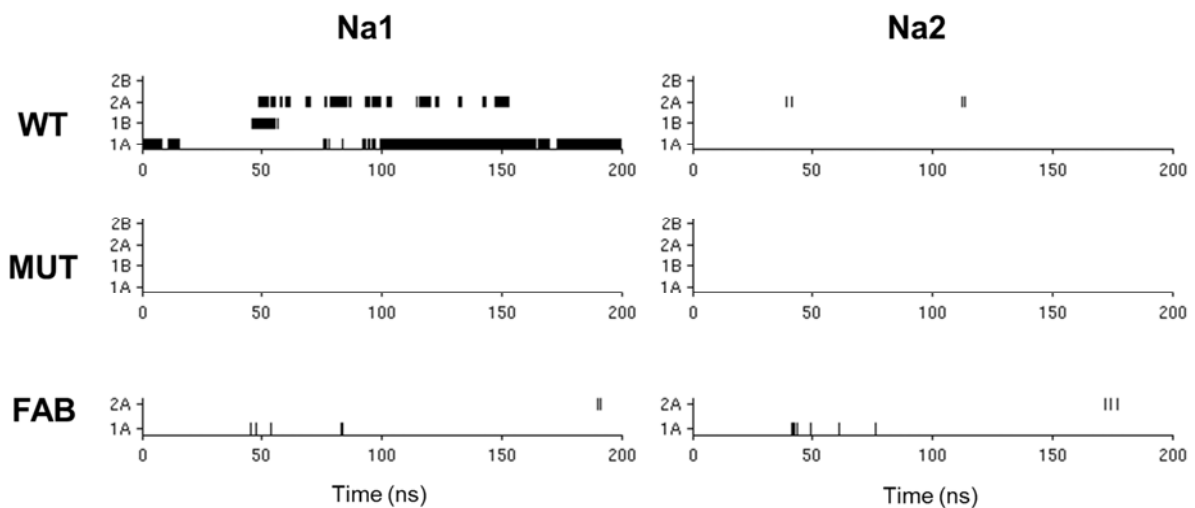

**Figure S3: Occupancy of the Na1 and Na2 site.** The occupancy was determined by identifying Na<sup>+</sup> ions within 4 Å of the center-of-mass of either Asn-27, Thr-254, and Asn-286 (Na1 site) or Val-23, Ala-351, and Ser-355 (Na2 site).
